1 **TITLE PAGE**

2

3 **TITLE:** THE USE OF COMPLEMENTARY PRACTICES BY PATIENTS UNDERGOING MEDICALLY  
4 ASSISTED REPRODUCTION: The place of Chinese medicine and related practices.

5

6 **AUTHORS:** O. Serri<sup>1</sup>, A. Meunier<sup>1</sup>, P.E. Bouet<sup>2,3</sup>, H. El Hachem<sup>4</sup>, B. Liu<sup>5</sup>, P. May-Panloup<sup>1,3\*</sup>.

7 ORCID : P.E.Bouet : 0000-0003-4568-1746; P.May-Panloup: 0000-0001-7609-7265.

8 <sup>1</sup> Biologie de la reproduction, Centre Hospitalier Universitaire, F-49000 Angers, France

9 <sup>2</sup> Gynécologie Obstétrique, Centre Hospitalier Universitaire, F-49000 Angers, France

10 <sup>3</sup> Univ Angers, INSERM, CNRS, MITOVASC, Equipe MitoLab, SFR ICAT, F-49000 Angers, France

11 <sup>4</sup> Department of Obstetrics and Gynecology, Lebanese American University Medical Center,  
12 Beirut, Lebanon

13 <sup>5</sup> Centre Intégré de médecine Chinoise, AP-HP Sorbonne Université, 75013 Paris, France

14

15 \*Correspondence to: Dr Pascale May-Panloup, Laboratoire de Biologie de la Reproduction,  
16 Centre Hospitalier Universitaire d'Angers, 49933 Angers cedex 9, France.

17 E-mail: [pamaypanloup@chu-angers.fr](mailto:pamaypanloup@chu-angers.fr)

18

19 **ABSTRACT**

20 **Purpose:** Infertility is associated with different factors, highly intricate but sometimes ill-  
21 defined. Despite the significant recent technological and therapeutic advancements, the  
22 success rates of assisted reproductive technologies (ART) remain relatively low. In this  
23 context several women have recourse to complementary practices (CP), in the hope of  
24 improving success rates and lowering the associated strain. These methods, are quite  
25 heterogenous, and are yet to be comprehensively analyzed in the literature.

26 The objective of our study was to evaluate, in women consulting at our fertility center, the  
27 current interest in these CP and more specifically, the role of Traditional Chinese Medicine  
28 (TCM) and associated Mind Body Intervention (MBI).

29 **Methods:** A prospective monocentric survey study at the fertility center of the Angers  
30 University Hospital between January and May 2022.

31 **Results:** 150 questionnaires were analyzed. Approximately 50% of women have recourse to  
32 CP, in the hope of improving the success rates of ART and reducing the associated stress and  
33 fatigue. The main CP used were the ones based on body manipulation, TCM and MBI. The  
34 lack of use was mainly linked to a lack of knowledge of these methods, and the vast majority  
35 of women would like to receive additional information about CP from the physicians at the  
36 center.

37 **Conclusion:** Our study shows a significant interest in CP in reproductive medicine. In view of  
38 the benefits of some of these practices, at least on the quality of life of patients, information  
39 on their value should be made available to all couples undergoing ART.

40

41

42 **KEYWORDS :** Assisted Reproductive Technologies, Chinese medicine, Complementary  
43 medicine, Infertility

44

45 **COMPETING INTEREST(S):** There are no competing interests.

46

## 47 INTRODUCTION

48 Infertility affects one in ten couples and, in France, approximately 3% of live births  
49 are the result of assisted reproductive technologies (ART) (1). However, and despite the  
50 recent technological advancements, success rates remain relatively low, with live birth rates  
51 being 10.3% per intrauterine insemination (IUI) cycle, and 18.5% per *in vitro* fertilization (IVF)  
52 cycle (1).

53 The diagnosis and treatment of infertility can cause significant psychosocial distress  
54 for the couple, which can manifest as emotional disturbances (2) and could, in return,  
55 negatively impact the chances of success of ART (3). The difficulty of dealing with infertility,  
56 coupled with the long and arduous process of IVF, and the lack of guaranteed results, can  
57 sometimes push couples to seek complementary methods of treatment, with different  
58 motives and expectations. In recent years, the use of these complementary methods, also  
59 referred to as “add-ons”, has significantly grown in the field of infertility and ART (4,5). They  
60 comprise of procedures, techniques, and medications that are used as complements to the  
61 standard ART protocols.

62 The first category includes the use of variants of the clinical and biological techniques  
63 used in classical protocols. These have been analyzed and listed by the HEFA in order to  
64 provide all patients easy and accessible information based on evidence-based medicine (6).

65 The second category includes the complementary practices (CP) used by patients,  
66 most often at their own initiative, despite the lack of any exhaustive analysis of these  
67 techniques, their mechanisms of action, objectives or efficiency. These treatments are highly  
68 popular nowadays, with a 2018 HEFA survey revealing that >50% of patients used one of  
69 them (acupuncture (26%), massages (11%), meditation (9%), and others (7%))(7).

70 Traditional Chinese medicine (TCM) is a medical system that is more than 3000 years  
71 old. Despite being considered a complimentary therapy in Western countries, it is the  
72 primary medicine in several Asian countries. It includes acupuncture, traditional  
73 pharmacopeia, and -mind-body interventions (MBI) (including manipulation techniques such  
74 as Tuina massage). Its efficiency in the field of infertility could rely on the adjustment of the  
75 hypothalamic-pituitary axis, the improvement of the ovarian function and the oocyte quality  
76 (especially in cases of decreased ovarian reserve), the enhancement of endometrial  
77 receptivity (vascularization and expression of hormone receptors), and the reduction of  
78 several inflammatory processes inherent to certain types of infertility (8).

79 The primary objective of our study was to evaluate, in women consulting at our fertility  
80 center for infertility, the interest in these complementary methods, and the reasons behind  
81 it. More precisely, our aim was to assess, in this patient population, the knowledge of TCM  
82 and related MBI, as well as the rate of recourse.

83

## 84 **MATERIALS AND METHODS**

### 85 **Study protocol**

86 We performed a prospective, monocentric descriptive and analytic study, with the  
87 purpose of describing and analyzing the complementary medical practices spontaneously  
88 used by women being managed for infertility. The survey was proposed to all women  
89 presenting to our fertility center, whether for an infertility work-up, fertility treatment  
90 (intrauterine insemination (IUI), IVF with or without ICSI), or for a post treatment follow-up.

### 91 **Methods**

92 An information letter and an anonymous survey on complementary and alternative  
93 practices in ART were printed and made available at the fertility center of the Angers  
94 University Hospital. The secretaries of the department offered them to all women presenting  
95 to the center between January and May 2022. Women who anonymously answered the  
96 survey put the papers back in a dedicated container in the waiting room. The container was  
97 regularly emptied, and the surveys collected by our research fellow.

98 We performed a descriptive analysis of the completed surveys: the complementary practices  
99 most used by patients, the sources of information that led to their use, and the motivation  
100 behind their pursuit. We compared the rate of recourse to complementary practices  
101 according to the patients' age, the education level, and the reason for their care in the  
102 center. The parametric Student's t-test was used for quantitative variables, and the chi-  
103 squared ( $\chi^2$ ) test was used for qualitative variables. All statistical tests were considered  
104 significant at p-value < 0.05.

#### 105 - ***Inclusion criteria***

106 All patients who presented to the fertility unit and answered the survey.

#### 107 - ***Non-inclusion criteria***

108 All patients who refused to complete the survey.

### 109 **Ethical and regulatory aspects**

110 The study received a favorable opinion from the Ethics committee of the Angers  
111 University Hospital, registered under the number 2021-213. The study is registered at the  
112 "Commission Nationale de l'informatique et des libertés" (CNIL) under the number ar21-  
113 0162v0.

114

115

116

117 **RESULTS**

118 **Population characteristics**

119 In total, 150 women completed the survey.

120 -Mean age of patients was 32.9 5.2 ( $\pm$  5.2) years.

121 -The causes of consultation at the fertility unit were: 44% for an IVF/ICSI treatment, 27% for  
122 an infertility work-up, 7% for an IUI, 7% for controlled ovarian stimulation (COS) followed by  
123 intercourse, 3% for post treatment follow-up, and 11% for other reasons (oocyte  
124 cryopreservation...)

125 Concerning the education level, 41% of participating women had a license degree, 26% had a  
126 Bachelor's degree, 22% had a Master's degree, and 11% had a high school degree.

127

128 **Patients using CP and their main reasons**

129

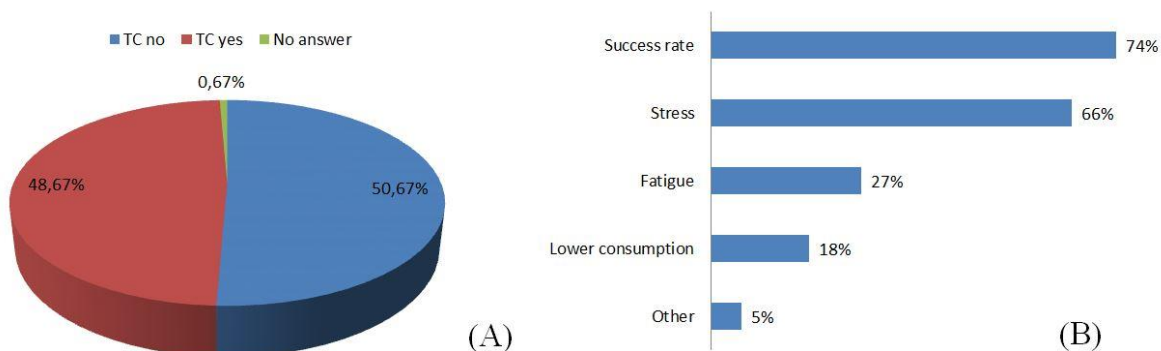

130

131 **Figure 1:** Sector diagram showing CP use in our population. In red the percentage of patients using CP, in blue the  
132 percentage of patients not using them and in green the percentage of non-response (A). Bar chart showing the main reasons  
133 why patients use CP, Lower consumption = help reduce the consumption of substances that might negatively impact fertility  
134 (Tobacco...) (B).

135

136 In our center 48.7% of the 150 women who filled the survey have recourse to CP (figure 1 A)

137 These patients mainly use CP in order to: Improve the success rate of ART, lower stress and  
138 fatigue levels.

139

140

141

142

143 **Reason for the care in the center according to the use or no of CP**

144

145

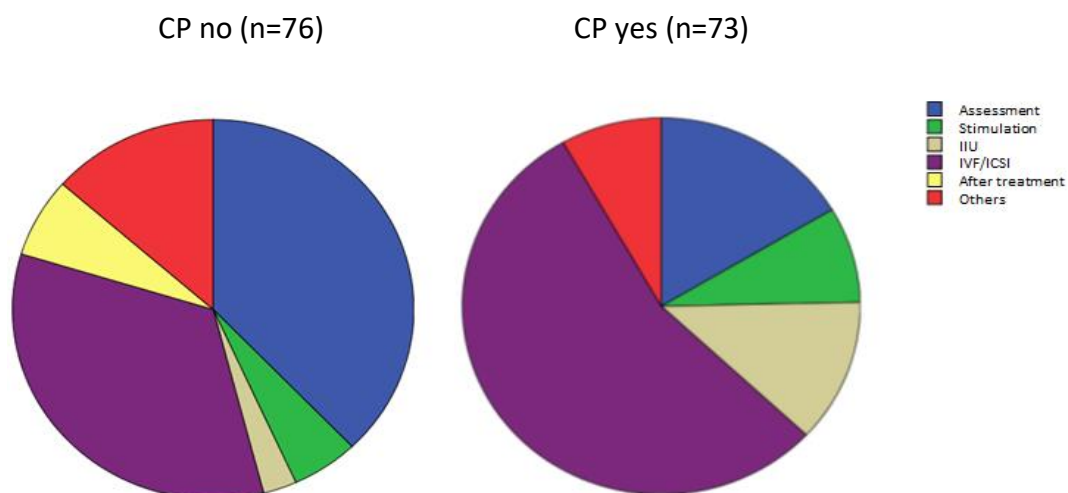

146

147 **Figure 2:** Sector diagram showing how the type of follow-up influencing the use of CP.

148

149 There was a significant difference ( $p=0.001$ ) in the type of fertility treatment between  
150 women who used and those who did not use CP: The majority of patients using CP were  
151 undergoing IVF/ICSI, while the majority of women not using CP were undergoing infertility  
152 workup.

153

154 **Use of CP according to the educational level:** There was no difference in the rate of  
155 recourse to CP according to the educational level ( $p=0.1$ )

156 **Use of CP according to age:** There was no age difference between women who used and  
157 those who did not use CP (32.9 vs 32.8 years,  $p =0.9$ , respectively)

158

159 **Type of CP used**

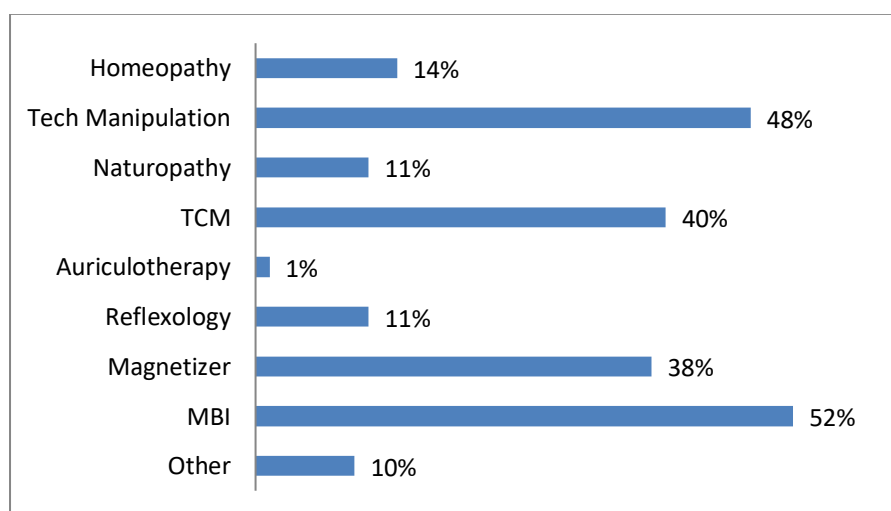

160

161 **Figure 3:** Type of CP used. Bar chart showing the percentage use of different types of CP in our population (n=73).

162 The most commonly used CP are : Techniques based on body manipulation (O/C/M :  
163 Osteopathy/chiropractic/massage), Mind-Body interventions (MBI), and traditional chinese  
164 medicine (TCM)

165

166 **Details of Mind-Body Interventions (MBI) (n=38) (Figure 5)**

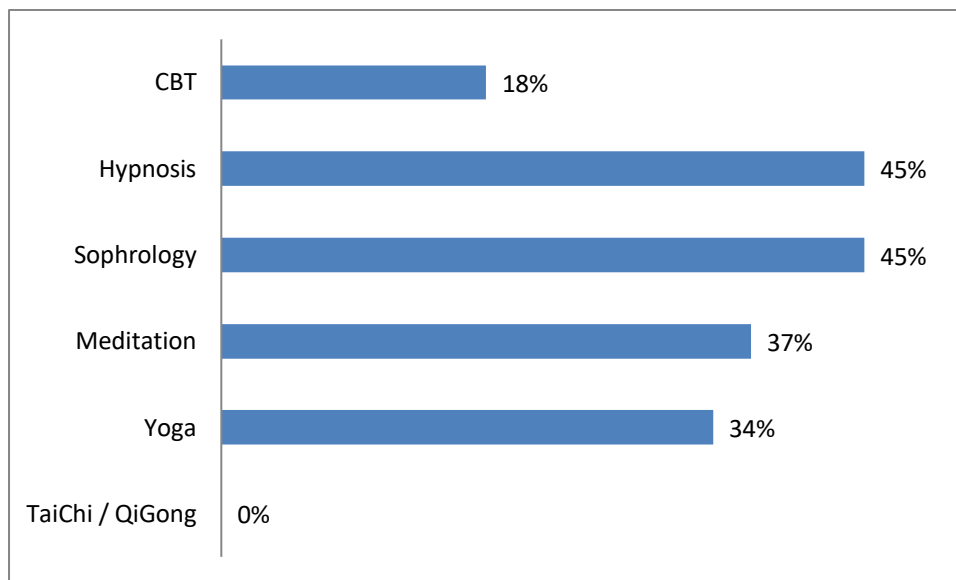

167

168 **Figure 4:** Bar chart showing the percentage use of different types of MBI in our population (n=38), CBT: Cognitive Behavioral  
169 Therapy.

170 Among the MBI, we noted a large heterogeneity of methods. None of the patients used Qi-  
171 Gong (QG) or Tai-Chi (Tchi).

172 **Mode of Discovery of CP**

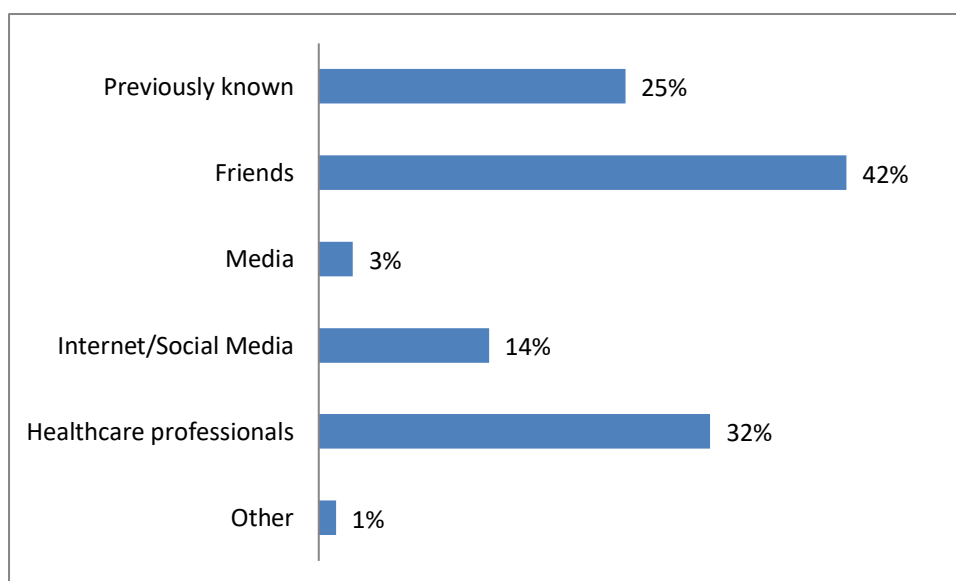

173

174 **Figure 5:** Bar chart showing the various means of CP information used by our patients.

175 The personal network was the most common mode of dissemination of CP.

176 Healthcare professionals (mostly midwives) play an important role.

177

### 178 **Reasons for not using CP and desire for information**

179

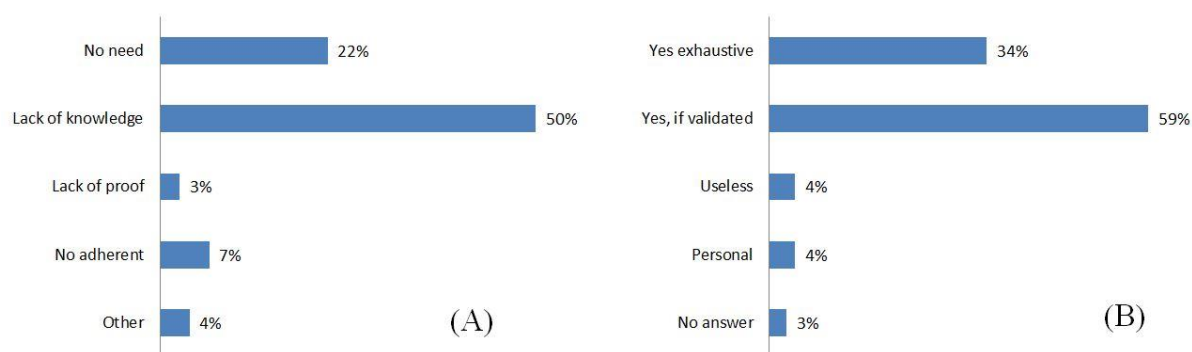

180

181 **Figure 6:** (A) Bar chart showing the main reasons why a part of our population doesn't use CP (n=76). (B) Bar chart showing  
182 the desire of patients in our population to be informed about CP, whether or not they use them (n=150).

183 The majority of patients who did not use CP underline their lack of knowledge of these methods.

184 Almost all patients who participated would like to receive information on CP from the physicians at  
185 the fertility unit. Most frequently, they want the information to be based on scientific proof, but a  
186 large part wants exhaustive information

187

## 188 **DISCUSSION**

189 Complementary and alternative medicine is defined by the World Health  
190 Organization (WHO) as a "broad set of health care practices that are not part of that  
191 country's own tradition or conventional medicine and are not fully integrated into the  
192 dominant health care system" (9). The WHO counts more than 400 complementary and  
193 alternatives medicines, including methods based on natural products (phytotherapy,  
194 aromatherapy), techniques based on manipulation (osteopathy, chiropractic...), mind-body  
195 interventions (hypnotherapy, meditation, sophrology...), or complete systems based on  
196 specific theories (Traditional Chinese Medicine, homeopathy...). These practices are quite  
197 heterogeneous, and it is impossible to discuss them as a single homogeneous group.

198 The use of these complementary practices is widespread in certain medical fields,  
199 most notably oncology. However, in the field of infertility, and more specifically during ART,  
200 their use is yet to be fully analyzed, on a French national or international level.



201 Infertility can be caused by chronic pathologies with mainly biologic determinants,  
202 but also environmental and psychosomatic linked to an important emotional charge in  
203 patients. CP offer a different form of accompaniment for these patients during their  
204 infertility journey, by offering support, helping them relax, and making them feel capable of  
205 maximizing their chances of success (10).

206 Our study has shown that a considerable number of women (48.7%) (Figure 1) have  
207 recourse to CP, a finding concordant with the literature. Indeed, the HEFA 2018 study had  
208 shown a 50% rate of recourse to CP among women treated for infertility (11). Likewise, an  
209 Australian study reported a 66% rate (12) while an American study of 428 couples reported a  
210 29% rate (13).

211 The main purposes, behind the recourse to CP, were to improve the pregnancy rates,  
212 and reduce the stress and fatigue associated with infertility treatments (Figure 2). It is worth  
213 noting that the utilization rate was higher among women undergoing IVF-ICSI treatment,  
214 which is widely known to be a long and arduous process (Figure 3). The most commonly  
215 employed CP were the ones based on body manipulation, mind-body interventions, and  
216 TCM (especially acupuncture) (Figure 4).

## 217 **Role of Traditional Chinese Medicine (TCM)**

218 TCM is a complete medical system that can have a positive impact on a woman's  
219 journey through ART, not only by its effects on the gonadotropic axis function (8), but also by  
220 its potential effect on the biopsychosocial components associated with the diagnosis of  
221 infertility and its treatment. However, and to the best of our knowledge, there are no  
222 studies in the literature that looked at its global efficiency. Most studies have been centered  
223 around acupuncture or MBI, most probably due to methodological limitations, as well as the  
224 difficulties of finding licensed and experienced practitioners of TCM in Western countries.

## 225 **Acupuncture**

226 Acupuncture is commonly used in the field of infertility, with the HEFA survey reporting a  
227 26% utilization rate among women undergoing ART (11). Acupuncture seems to improve the  
228 well-being of patients by decreasing anxiety, and by reducing the pain felt during invasive  
229 procedures such as oocyte retrieval or embryo transfer (14). The first randomized controlled  
230 trials (RCT) on acupuncture in women undergoing infertility treatments are relatively recent.  
231 In 2002, a study including 160 women who did or did not undergo an acupuncture session,  
232 25 minutes before and after the embryo transfer, showed a significant increase in pregnancy  
233 rates in the acupuncture group (42.5% vs 26.3%,  $P < 0.03$ ) (15). Two other studies (16,17)  
234 also showed a significant improvement in pregnancy rates in IVF patients undergoing  
235 acupuncture on the day of embryo transfer. A 2006 study included 225 patients in two  
236 groups: the first group received acupuncture according to the TCM principles in the luteal  
237 phase, after the transfer, and the second group received a placebo (placebo points) (18). The  
238 pregnancy and implantation rates were significantly higher in the acupuncture group (29.4%

239 vs 12.6% and 8.2% vs 3.2%,  $p < 0.01$ , respectively). A recent study showed that, when  
240 compared with estrogen treatment, acupuncture and TCM significantly improved the  
241 endometrial thickness and the pregnancy rates in women with thin endometrium (19).

242 On the other hand, some studies reported contradictory outcomes and failed to show any  
243 positive impact of acupuncture. In a series of 150 patients, Domar et al. failed to replicate  
244 the results reported in the first 2002 study (20). Similarly, Smith et al. did not show any  
245 improvement in pregnancy rates in patients receiving a conventional acupuncture protocol  
246 when compared with patients receiving placebo (21). In a multicentric RCT in 2017, Fan et  
247 al. did not find any improvement in fertility in women with polycystic ovarian syndrome  
248 (PCOS) (22). Likewise, Madaschi et al. did not find any difference in the outcomes of 208  
249 women undergoing IVF/ICSI between the group who had acupuncture and a control group  
250 (23). Another 2013 RCT which included 62 women with PCOS undergoing IVF/ICSI showed a  
251 significant improvement of embryo quality following acupuncture, but there were no  
252 differences in the pregnancy rates after IVF compared with the control group (24).

253 Several systematic reviews and meta-analyses have attempted to synthesize the available  
254 data. While some failed to show any benefit (25,26), most of the recent ones, have reported  
255 a positive an impact of acupuncture on fertility and IVF outcomes (27–30).

256 In all, and based on the current available evidence, it is difficult to conclude on the impact of  
257 acupuncture on the pregnancy rates in ART. The discordance in the results is probably the  
258 consequence of the heterogeneity across the studies, most notably in the populations  
259 included, the indications, the experience of the practitioners, the choice of acupuncture  
260 points, and the whole course of treatment administered. Larger and better defined RCT,  
261 using more rigorous methodologies, are needed to confirm any potential positive impact of  
262 acupuncture.

### 263 **Mind-Body interventions (MBI)**

264 Mind-body interventions are based on the interconnexion between the physical (bodily  
265 functions), psychosocial (emotions), and spiritual (meaning of life) well-being of a person, all  
266 of which play an important role when facing stressful life events.

267 ART are associated with several stressful factors that can significantly affect couples with  
268 infertility. This is why the “European Society of Human Reproduction and Embryology”  
269 (ESHRE) Psychology and Counselling Guideline Development” recommends psychosocial  
270 support as complementary therapy to infertility treatments (31).

271 Besides the discomfort it generates, stress is widely known to have deleterious effects on  
272 global health in general and on fertility in particular. Indeed, exposure to stress leads to the  
273 activation of certain areas of the brain, such as the prefrontal cortex, hippocampus, and  
274 amygdala. That signal is integrated by the hypothalamus which will in turn, via the central  
275 nervous system, stimulate the adrenal cortex to secrete adrenaline and noradrenaline and

276 generate an adaptive response that impacts several systems in the body (cardiovascular,  
277 respiratory...). In parallel, the hypothalamus releases the corticotropin release hormone  
278 which triggers the production of adrenocorticotropin hormone (ACTH) by the pituitary,  
279 which will stimulate the production of corticosteroids. Corticosteroids can negatively impact  
280 the reproductive tract via several pathways: an interaction with the GnRH producing  
281 neurons, which can affect the gonadotropic axis and the production of FSH and LH, and an  
282 alteration of ovarian steroidogenesis and the development of the uterine mucosa (32).

283 The clinical studies on the impact of stress on reproduction have produced conflicting  
284 results. Some have failed to confirm a negative impact of stress on ART (33,34), while others  
285 have clearly demonstrated that negative effect (3,35). In a recent study, Haimovici et al. (36)  
286 found that an increase in the levels of stress-specific cytokines in the blood and the follicular  
287 fluid on the day of the oocyte retrieval was associated with decreased fertilization,  
288 implantation, pregnancy, and live birth rates (36).

289 MBI could modify the activity of the cerebral areas most impacted by stress (Prefrontal  
290 cortex, amygdala, hippocampus and hypothalamus). The use of the techniques has been  
291 linked to mood improvement and decrease of stress biomarkers. Furthermore, some of the  
292 MBI (Mindfulness, Yoga, Tai Chi and Qi Gong) could be able to affect gene expression,  
293 leading to an inhibition of the Kappa B pathway which is activated in case of chronic stress  
294 (37), as well as certain epigenetic mechanisms (38). Globally, MBI seem to be efficient in  
295 reducing stress during ART (32). Several meta-analyses have reported on the significant  
296 impact of MBI in reducing the psychological distress of patients undergoing ART, as well as  
297 improving the ART outcomes (39,40). A 2016 Cochrane review concluded that the effects of  
298 these interventions on pregnancy rates were uncertain due to the very low quality of the  
299 evidence, and that there was significant heterogeneity in the studies with regards to the  
300 patient population, the techniques and the protocols used (41). Other meta-analyses  
301 reported that these techniques had a significantly positive impact on the psychological  
302 health of patients without any improvement in the pregnancy and live births rates (42,43).

303 Globally, if the positive impact of MBI on ART outcomes (pregnancy and live birth rates) is  
304 yet to be definitely established, the literature is unanimous when it comes to their efficiency  
305 in improving the well-being of patients undergoing ART, and more specifically in significantly  
306 reducing the stress and anxiety levels.

307 The MBI used in the aforementioned studies were quite heterogenous: cognitive behavioral  
308 therapy, hypnosis, relaxation, respiration... (32,42,44). Only two studies, both by the same  
309 team, used a MBI approach based on TCM that included Tai-chi exercises, meditation and  
310 respiration (45). Both studies showed an improvement of the anxiety and well-being score of  
311 patients during ART, but did not show any improvement in pregnancy rates (46,47).

312 In our study, despite anxiety and fatigue being a major source of concern for patients, only  
313 38 out of 150 resorted to MBI, and none used Tai-chi or Qi Gong (Figure 5). Tai Chi and Qi

314 Gong combine slow movements and respiration exercises with relaxation and meditation,  
315 and are known to have a beneficial impact on the quality of life by reducing stress and  
316 anxiety levels, as well as relaxation and fatigue (48,49). These techniques could therefore  
317 play an important part in improving the well-being of women undergoing ART, and  
318 potentially improve the chances of success.

### 319 **Knowledge and information about Complementary Practices (CP)**

320 In the current study, most women who resorted to CP were introduced to them by people  
321 from their personal network and by patients already using them. In 32% of cases, a  
322 healthcare professional was behind the introduction. It is worth noting that in a 2013 USA  
323 study, almost 90% of physicians interviewed reported being curious about complementary  
324 and alternative medicine, and 75% were interested in adding and integrating these practices  
325 to conventional medicine, as well as informing their patients about the methods available  
326 (14).

327 The lack of use of CP can be explained by the lack of knowledge and information. Indeed,  
328 among women who did not resort to CP, 50% were unaware of them, while a smaller  
329 percentage did not believe they needed them, and very few were doubtful and suspicious of  
330 their efficacy.

331 Out of the 150 women who answered whether or not they would like the physicians  
332 involved in ART to inform them about CP, only 12 thought that it was useless or too  
333 personal. The vast majority wanted their physicians to share global information about all  
334 these practices, and back it up with scientific proof.

335 For the physicians involved, the main problem is the large diversity of these methods, and  
336 the difficulty of knowing the benefits of each and every one. And even if for many of these  
337 techniques, there are several studies available in the literature, they are quite heterogenous  
338 and have lots of biases. However, newer and better studies are emerging and offering a  
339 better analysis of these practices. In particular, acupuncture and MBI seem to have a  
340 beneficial impact, at least in terms of quality of life and well-being of patients undergoing  
341 ART. The effect on pregnancy and live births rates remains under investigation.

342

### 343 **CONCLUSION**

344 Our study has shown that women undergoing ART are interested in knowing about  
345 and resorting to complementary and alternative practices, with the aim of improving their  
346 chances of pregnancy as well as helping them deal with the stress and fatigue associated  
347 with ART. Among the different CP available, the ones based on body manipulation,  
348 acupuncture and mind-body interventions are the most coveted. Traditional Chinese  
349 Medicine includes all these techniques, and even though the jury is still out on its efficiency

350 in improving pregnancy and live birth rates, information about its application and its benefits  
351 should be made available to all couples undergoing ART.

352

### 353 **ACKNOWLEDGMENTS**

354 We would like to thank all the people involved in the study. We also acknowledge the  
355 support of the «Institut National de la Santé et de la Recherche Médicale (INSERM) », of the  
356 « Centre National de la Recherche Scientifique (CNRS) », the Angers University, and the  
357 Angers university Hospital.

358 We thank the Integrated Centre of Chinese Medicine of the Sorbonne University for its  
359 expertise in TCM and related MBI

360

### 361 **BIBLIOGRAPHIE**

362

- 363 1. ABM. Rapport d'Activité d'Assistance Médicale à la Procréation 2022 sur les données 2020.
- 364 2. Kahyaoglu Sut H, Balkanli Kaplan P. Quality of life in women with infertility via the FertiQoL and the Hospital  
365 Anxiety and Depression Scales: Quality of life in women with infertility. *Nurs Health Sci. mars*  
366 2015;17(1):84-9.
- 367 3. Gourounti K, Anagnostopoulos F, Vaslamatzis G. The Relation of Psychological Stress to Pregnancy Outcome  
368 Among Women Undergoing In-Vitro Fertilization and Intracytoplasmic Sperm Injection. *Women Health. 21*  
369 juin 2011;51(4):321-39.
- 370 4. Stein J, Harper JC. Analysis of fertility clinic marketing of complementary therapy add-ons. *Reprod Biomed*  
371 *Soc Online. août 2021;13:24-36.*
- 372 5. Lensen S, Hammarberg K, Polyakov A, Wilkinson J, Whyte S, Peate M, et al. How common is add-on use and  
373 how do patients decide whether to use them? A national survey of IVF patients. *Hum Reprod. 18 juin*  
374 2021;36(7):1854-61.
- 375 6. HFEA 2020a : Treatment add-ons [Internet]. 2020. Disponible sur: [https://www.hfea.-](https://www.hfea.gov.uk/treatments/explore-all-treatments/treatment-add-ons/)  
376 [gov.uk/treatments/explore-all-treatments/treatment-add-ons/](https://www.hfea.gov.uk/treatments/explore-all-treatments/treatment-add-ons/)
- 377 7. HFEA, 2018 : Pilot national fertility patient survey. [Internet]. 2018. Disponible sur:  
378 [https://www.hfea.gov.uk/about-us/news-and-press-releases/2018-news-and-press-releases/our-national-](https://www.hfea.gov.uk/about-us/news-and-press-releases/2018-news-and-press-releases/our-national-patient-survey-results/)  
379 [patient-survey-results/](https://www.hfea.gov.uk/about-us/news-and-press-releases/2018-news-and-press-releases/our-national-patient-survey-results/)
- 380 8. Feng J, Wang J, Zhang Y, Zhang Y, Jia L, Zhang D, et al. The Efficacy of Complementary and Alternative  
381 Medicine in the Treatment of Female Infertility. Tamagno G, éditeur. *Evid Based Complement Alternat Med.*  
382 23 avr 2021;2021:1-21.
- 383 9. Organisation mondiale de la Santé. Stratégie de l'OMS pour la médecine traditionnelle pour 2014-2023  
384 [Internet]. Genève: Organisation mondiale de la Santé; 2013 [cité 4 oct 2022]. 75 p. Disponible sur:  
385 <https://apps.who.int/iris/handle/10665/95009>
- 386 10. Coulson C, Jenkins J. Complementary and alternative medicine utilisation in NHS and private clinic settings:  
387 a United Kingdom survey of 400 infertility patients. *J Exp Clin Assist Reprod. déc 2005;2(1):5.*

- 388 11.HFEA, 2018. Pilot national fertility patient survey. 2020.
- 389 12.Stankiewicz M, Smith C, Alvino H, Norman R. The use of complementary medicine and therapies by patients  
390 attending a reproductive medicine unit in South Australia: A prospective survey. *Aust N Z J Obstet Gynaecol.*  
391 *avr 2007;47(2):145-9.*
- 392 13.Smith JF, Eisenberg ML, Millstein SG, Nachtigall RD, Shindel AW, Wing H, et al. The use of complementary  
393 and alternative fertility treatment in couples seeking fertility care: data from a prospective cohort in the  
394 United States. *Fertil Steril.* mai 2010;93(7):2169-74.
- 395 14.Clark NA, Will M, Moravek MB, Fisseha S. A systematic review of the evidence for complementary and  
396 alternative medicine in infertility. *Int J Gynecol Obstet.* sept 2013;122(3):202-6.
- 397 15.Paulus WE, Zhang M, Strehler E, El-Danasouri I, Sterzik K. Influence of acupuncture on the pregnancy rate in  
398 patients who undergo assisted reproduction therapy. *Fertil Steril.* avr 2002;77(4):721-4.
- 399 16.Westergaard LG, Mao Q, Kroglund M, Sandrini S, Lenz S, Grinsted J. Acupuncture on the day of embryo  
400 transfer significantly improves the reproductive outcome in infertile women: a prospective, randomized  
401 trial. *Fertil Steril.* mai 2006;85(5):1341-6.
- 402 17.Samsami Deghani A, Homayouni K, Kannejad Z, Kannejad Z. The effect of acupuncture on the day of  
403 embryo transfer on the in vitro fertilization outcomes: An RCT. *Int J Reprod Biomed IJRM [Internet].* 5 avr  
404 2020 [cité 4 oct 2022]; Disponible sur: <https://knepublishing.com/index.php/ijrm/article/view/6719>
- 405 18.Dieterle S, Ying G, Hatzmann W, Neuer A. Effect of acupuncture on the outcome of in vitro fertilization and  
406 intracytoplasmic sperm injection: a randomized, prospective, controlled clinical study. *Fertil Steril.* mai  
407 2006;85(5):1347-51.
- 408 19.Ling-Yun L, Ying-Fang C, Wen-Yu L, Jian-Yi Z, Chong-Lian F. Effect of acupuncture combined with Zi Shen Tian  
409 Jing prescription on infertility due to thin endometrium. *Shangai J Acupunct Moxibustion.* 2020;39(4):411-5.
- 410 20.Domar AD, Meshay I, Kelliher J, Alper M, Powers RD. The impact of acupuncture on in vitro fertilization  
411 outcome. *Fertil Steril.* mars 2009;91(3):723-6.
- 412 21.Smith C, Coyle M, Norman RJ. Influence of acupuncture stimulation on pregnancy rates for women  
413 undergoing embryo transfer. *Fertil Steril.* mai 2006;85(5):1352-8.
- 414 22.Fan AY, Gu S, Yang G. [Is acupuncture ineffective in treating infertility associated with polycystic ovary  
415 syndrome? A reanalysis of data on the clinical trial by WU Xiaoke's team published on JAMA]. *Zhongguo*  
416 *Zhen Jiu Chin Acupunct Moxibustion.* 12 déc 2017;37(12):1337-41.
- 417 23.Madaschi C, Braga DPAF, Figueira R de CS, Iaconelli A, Borges E. Effect of Acupuncture on Assisted  
418 Reproduction Treatment Outcomes. *Acupunct Med.* déc 2010;28(4):180-4.
- 419 24.Rashidi BH, Tehrani ES, Hamedani NA, Pirzadeh L. Effects of Acupuncture on the Outcome of in Vitro  
420 Fertilisation and Intracytoplasmic Sperm Injection in Women with Polycystic Ovarian Syndrome. *Acupunct*  
421 *Med.* juin 2013;31(2):151-6.
- 422 25.Cheong YC, Dix S, Hung Yu Ng E, Ledger WL, Farquhar C. Acupuncture and assisted reproductive technology.  
423 *Cochrane Gynaecology and Fertility Group, éditeur. Cochrane Database Syst Rev [Internet].* 26 juill 2013  
424 [cité 4 oct 2022]; Disponible sur: <https://doi.wiley.com/10.1002/14651858.CD006920.pub3>
- 425 26.Zhu C, Xia W, Huang J, Zhang X, Li F, Yu X, et al. Effects of acupuncture on the pregnancy outcomes of  
426 frozen-thawed embryo transfer: A systematic review and meta-analysis. *Front Public Health.* 9 sept  
427 2022;10:987276.

- 428 27. Manheimer E, Zhang G, Udoff L, Haramati A, Langenberg P, Berman BM, et al. Effects of acupuncture on  
429 rates of pregnancy and live birth among women undergoing in vitro fertilisation: systematic review and  
430 meta-analysis. *BMJ*. 8 mars 2008;336(7643):545-9.
- 431 28. Yang H, Hu W hui, Xu G xing, Yin Z han, Yu S yi, Liu J jia, et al. Transcutaneous electrical acupoint stimulation  
432 for pregnancy outcomes in women undergoing in vitro fertilization-embryo transfer: A systematic review  
433 and meta-analysis. *Front Public Health*. 11 août 2022;10:892973.
- 434 29. Quan K, Yu C, Wen X, Lin Q, Wang N, Ma H. Acupuncture as Treatment for Female Infertility: A Systematic  
435 Review and Meta-Analysis of Randomized Controlled Trials. Kuo CY, éditeur. *Evid Based Complement*  
436 *Alternat Med*. 16 févr 2022;2022:1-15.
- 437 30. Wang X, Wang Y, Wei S, He B, Cao Y, Zhang N, et al. An Overview of Systematic Reviews of Acupuncture for  
438 Infertile Women Undergoing in vitro Fertilization and Embryo Transfer. *Front Public Health*. 20 avr  
439 2021;9:651811.
- 440 31. Gameiro S, Boivin J, Dancet E, de Klerk C, Emery M, Lewis-Jones C, et al. ESHRE guideline: routine  
441 psychosocial care in infertility and medically assisted reproduction—a guide for fertility staff: Figure 1. *Hum*  
442 *Reprod*. nov 2015;30(11):2476-85.
- 443 32. Raad G, Tanios J, Azoury J, Daher A, Fakhri C, Bakos HW. Neurophysiology of cognitive behavioural therapy,  
444 deep breathing and progressive muscle relaxation used in conjunction with ART treatments: a narrative  
445 review. *Hum Reprod Update*. 19 févr 2021;27(2):324-38.
- 446 33. Nicoloso-SantaBarbara J, Busso C, Moyer A, Lobel M. Just relax and you'll get pregnant? Meta-analysis  
447 examining women's emotional distress and the outcome of assisted reproductive technology. *Soc Sci Med*.  
448 sept 2018;213:54-62.
- 449 34. Anderheim L, Holter H, Bergh C, Möller A. Does psychological stress affect the outcome of in vitro  
450 fertilization? *Hum Reprod*. 1 oct 2005;20(10):2969-75.
- 451 35. Matthiesen SMS, Frederiksen Y, Ingerslev HJ, Zachariae R. Stress, distress and outcome of assisted  
452 reproductive technology (ART): a meta-analysis. *Hum Reprod*. oct 2011;26(10):2763-76.
- 453 36. Haimovici F, Anderson JL, Bates GW, Racowsky C, Ginsburg ES, Simovici D, et al. Stress, anxiety, and  
454 depression of both partners in infertile couples are associated with cytokine levels and adverse IVF  
455 outcome. *Am J Reprod Immunol*. avr 2018;79(4):e12832.
- 456 37. Buric I, Farias M, Jong J, Mee C, Brazil IA. What Is the Molecular Signature of Mind–Body Interventions? A  
457 Systematic Review of Gene Expression Changes Induced by Meditation and Related Practices. *Front*  
458 *Immunol*. 16 juin 2017;8:670.
- 459 38. Yang HJ, Koh E, Sung MK, Kang H. Changes Induced by Mind–Body Intervention Including Epigenetic Marks  
460 and Its Effects on Diabetes. *Int J Mol Sci*. 28 janv 2021;22(3):1317.
- 461 39. Frederiksen Y, Farver-Vestergaard I, Skovgard NG, Ingerslev HJ, Zachariae R. Efficacy of psychosocial  
462 interventions for psychological and pregnancy outcomes in infertile women and men: a systematic review  
463 and meta-analysis. *BMJ Open*. 28 janv 2015;5(1):e006592-e006592.
- 464 40. Chow KM, Cheung MC, Cheung IK. Psychosocial interventions for infertile couples: a critical review. *J Clin*  
465 *Nurs*. août 2016;25(15-16):2101-13.
- 466 41. Verkuijlen J, Verhaak C, Nelen WL, Wilkinson J, Farquhar C. Psychological and educational interventions for  
467 subfertile men and women. Cochrane Gynaecology and Fertility Group, éditeur. *Cochrane Database Syst Rev*  
468 [Internet]. 31 mars 2016 [cité 15 juill 2022];2016(3). Disponible sur:  
469 <http://doi.wiley.com/10.1002/14651858.CD011034.pub2>

- 470 42.LoGiudice JA, Massaro J. The impact of complementary therapies on psychosocial factors in women  
471 undergoing in vitro fertilization (IVF): A systematic literature review. *Appl Nurs Res.* févr 2018;39:220-8.
- 472 43.Heredia A, Padilla F, Castilla JA, Garcia-Retamero R. Effectiveness of a psychological intervention focused on  
473 stress management for women prior to IVF. *J Reprod Infant Psychol.* 14 mars 2020;38(2):113-26.
- 474 44.Ying L, Wu LH, Loke AY. The effects of psychosocial interventions on the mental health, pregnancy rates, and  
475 marital function of infertile couples undergoing in vitro fertilization: a systematic review. *J Assist Reprod  
476 Genet.* juin 2016;33(6):689-701.
- 477 45.Chan CHY, Chan CLW, Ng SM, Ng EHY, Ho PC. Body-mind-spirit intervention for IVF Women. *J Assist Reprod  
478 Genet.* déc 2005;22(11-12):419-27.
- 479 46.Chan CHY, Ng EHY, Chan CLW, Ho, Chan THY. Effectiveness of psychosocial group intervention for reducing  
480 anxiety in women undergoing in vitro fertilization: a randomized controlled study. *Fertil Steril.* févr  
481 2006;85(2):339-46.
- 482 47.Chan CHY, Chan CLW, Ng EHY, Ho PC, Chan THY, Lee GL, et al. Incorporating spirituality in psychosocial  
483 group intervention for women undergoing *in vitro* fertilization: A prospective randomized controlled study:  
484 *Spirituality intervention for IVF patients.* *Psychol Psychother Theory Res Pract.* déc 2012;85(4):356-73.
- 485 48.Wang CW, Chan CH, Ho RT, Chan JS, Ng SM, Chan CL. Managing stress and anxiety through qigong exercise  
486 in healthy adults: a systematic review and meta-analysis of randomized controlled trials. *BMC Complement  
487 Altern Med.* déc 2014;14(1):8.
- 488 49.van Dam K. Individual Stress Prevention through Qigong. *Int J Environ Res Public Health.* 8 oct  
489 2020;17(19):7342.
